# Supplementary material for: Calciprotein Particles Cause Endothelial Dysfunction under Flow
Source: Int J Mol Sci. 2020 Nov 20;21(22):8802. doi: 10.3390/ijms21228802 (PMC7699979; doi:10.3390/ijms21228802)
Supplement: Supplementary file 1 [file ijms-21-08802-s001.zip]

Archive with 6 entries (6 files):
- ijms-987105 (R2, clean).docx
- ijms-987105 (R2, clean).pdf
- Legends to Supplementary Figures.pdf
- Supplementary Figure 1.tif
- Supplementary Figure 3.tif
- Supplementary Figure 2.tif
